# Supplementary material for: Improved mitochondrial coupling as a response to high mass-specific metabolic rate in extremely small mammals
Source: Oxford University Press journal article supplement (doi:10.1242/jeb.215558), 2020-01-01
Supplement: jeb215558supp.pdf [file jeb215558supp.pdf]

**Table S1 : Results of statistical analyses for the different parameters studied**

| Tested variable                                                                           | Test           | Effect                  | DF | Test value | p-value | Effective<br>( <i>M. mattheyi</i> , <i>M. minutoides</i> , <i>M. musculus</i> ) |
|-------------------------------------------------------------------------------------------|----------------|-------------------------|----|------------|---------|---------------------------------------------------------------------------------|
| <b>Body mass</b>                                                                          |                |                         |    |            |         |                                                                                 |
|                                                                                           | Kruskal-Wallis | Species                 | 2  | 64.491     | < 0.001 | 25, 30, 24                                                                      |
| <b>Liver mass</b>                                                                         |                |                         |    |            |         |                                                                                 |
|                                                                                           | Linear model   | log(body mass)          | 1  | 1689.770   | < 0.001 |                                                                                 |
|                                                                                           |                | species                 | 2  | 4.163      | 0.022   | 16, 19, 17                                                                      |
|                                                                                           |                | log(body mass):species  | 2  | 6.174      | 0.004   |                                                                                 |
| <b>Relative liver mass</b>                                                                |                |                         |    |            |         |                                                                                 |
|                                                                                           | Linear model   | log(body mass)          | 1  | 19.637     | < 0.001 |                                                                                 |
|                                                                                           |                | species                 | 2  | 4.163      | 0.022   | 16, 19, 17                                                                      |
|                                                                                           |                | log(body mass) :species | 2  | 6.174      | 0.004   |                                                                                 |
| <b>Mass-specific metabolic rate – log(metabolic rate) as a function of log(body mass)</b> |                |                         |    |            |         |                                                                                 |

|                                                                                              |                |                  |       |         |         |            |
|----------------------------------------------------------------------------------------------|----------------|------------------|-------|---------|---------|------------|
|                                                                                              | Linear model   | log(body mass)   | 1, 26 | 159.265 | < 0.001 | 9, 11, 5   |
|                                                                                              |                | Activation state | 1, 29 | 573.457 | < 0.001 |            |
| <b>Surface-specific metabolic rate – log(metabolic rate) as a function of log(body mass)</b> |                |                  |       |         |         |            |
|                                                                                              | Linear model   | log(body mass)   | 1, 26 | 25.299  | < 0.001 | 9, 11, 5   |
|                                                                                              |                | Activation state | 1, 29 | 573.457 | < 0.001 |            |
| <b>Respiratory capacities of permeabilized muscular fibers</b>                               |                |                  |       |         |         |            |
| State 2                                                                                      | Kruskal-Wallis | species          | 2     | 16,990  | < 0.001 | 15, 18, 10 |
| State 3 <sub>unc</sub>                                                                       | Kruskal-Wallis | species          | 2     | 19,602  | < 0.001 | 15, 18, 10 |
| <b>Respiratory capacities of skeletal muscle mitochondria</b>                                |                |                  |       |         |         |            |
| 0 $\mu$ M (Oligomycine)                                                                      | Kruskal-Wallis | species          | 2     | 15.975  | < 0.001 | 6, 6, 7    |
| 20 $\mu$ M ADP                                                                               | Kruskal-Wallis | species          | 2     | 15.583  | < 0.001 | 6, 6, 7    |
| 100 $\mu$ M ADP                                                                              | Kruskal-Wallis | species          | 2     | 11.991  | 0.002   | 6, 6, 7    |
| 500 $\mu$ M ADP                                                                              | Kruskal-Wallis | species          | 2     | 15.219  | < 0.001 | 6, 6, 7    |
| State 3 <sub>unc</sub>                                                                       | Kruskal-Wallis | species          | 2     | 12.492  | 0.002   | 6, 6, 7    |
| <b>Respiratory capacities of liver mitochondria</b>                                          |                |                  |       |         |         |            |
| 0 $\mu$ M (Oligomycine)                                                                      | Kruskal-Wallis | Species          | 2     | 7.050   | 0.029   | 6, 6, 11   |

|                        |                |         |   |        |       |          |
|------------------------|----------------|---------|---|--------|-------|----------|
| 20 $\mu$ M ADP         | Kruskal-Wallis | Species | 2 | 11.219 | 0.004 | 6, 6, 11 |
| 100 $\mu$ M ADP        | Kruskal-Wallis | Species | 2 | 11.097 | 0.004 | 6, 6, 11 |
| State 3 <sub>unc</sub> | Kruskal-Wallis | species | 2 | 5.672  | 0.059 | 6, 6, 11 |

---

**Maximal ATP syntheses for skeletal muscle and liver mitochondria**

|                 |                |         |   |        |       |          |
|-----------------|----------------|---------|---|--------|-------|----------|
| Skeletal muscle | Kruskal-Wallis | Species | 2 | 12.952 | 0.002 | 6, 6, 7  |
| Liver           | Kruskal-Wallis | Species | 2 | 12.68  | 0.002 | 6, 6, 11 |

---

**Mitochondrial efficiency of skeletal muscle**

|                |                           |                |       |          |         |         |
|----------------|---------------------------|----------------|-------|----------|---------|---------|
| ATP vs. oxygen | Linear mixed-effect model | oxygen         | 1, 66 | 4574.604 | < 0.001 | 6, 6, 7 |
|                |                           | species        | 2, 20 | 22.763   | < 0.001 |         |
|                |                           | Oxygen:species | 2, 66 | 5.686    | 0.005   |         |

---

|                       |                           |             |       |         |         |         |
|-----------------------|---------------------------|-------------|-------|---------|---------|---------|
| ATP/O vs. log(oxygen) | Linear mixed-effect model | Log(oxygen) | 1, 68 | 485.130 | < 0.001 | 6, 6, 7 |
|                       |                           | species     | 2, 20 | 48.351  | < 0.001 |         |

---

**Mitochondrial efficiency of liver**

|                       |                           |                |       |         |         |          |
|-----------------------|---------------------------|----------------|-------|---------|---------|----------|
| ATP vs. oxygen        | Linear mixed-effect model | oxygen         | 1, 41 | 485.305 | < 0.001 |          |
|                       |                           | species        | 2, 19 | 8.152   | 0.003   | 6, 6, 11 |
|                       |                           | Oxygen:species | 2, 41 | 40.562  | < 0.001 |          |
| ATP/O vs. log(oxygen) | Linear mixed-effect model | Log(oxygen)    | 1, 43 | 109.219 | < 0.001 |          |
|                       |                           | species        | 2, 19 | 2.271   | 0.088   | 6, 6, 11 |
